# Supplementary material for: Effects of Teduglutide on Diarrhea in Pediatric Patients with Short Bowel Syndrome-Associated Intestinal Failure
Source: PubMed Central journal article supplement — J Pediatr Gastroenterol Nutr. 2023 Aug 22;77(5):666–71. doi: 10.1097/MPG.0000000000003922 (PMC10583903; doi:10.1097/mpg.0000000000003922), 2023-08-22
Supplement: mpg-77-666-s001.pdf [file mpg-77-666-s001.pdf]

**Figure, Supplemental Digital Content 1. CONSORT diagram.**

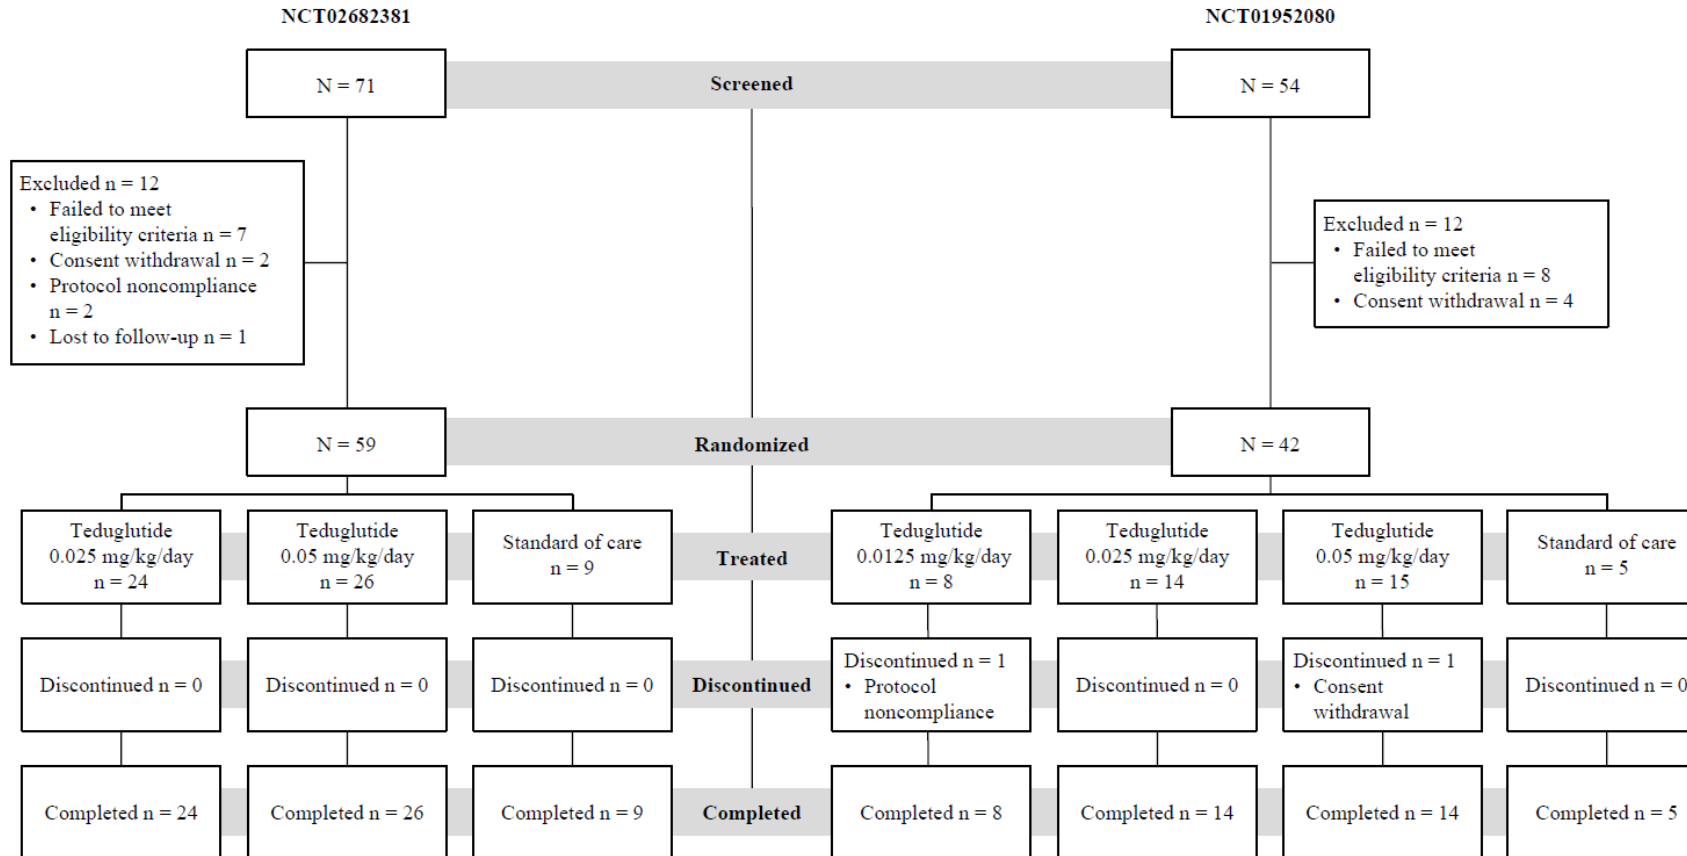

Patients in the teduglutide treatment arms received a once-daily subcutaneous injection of teduglutide 0.0125 mg/kg (NCT01952080 only), 0.025 mg/kg, or 0.05 mg/kg (NCT01952080 and NCT02682381) (1,2).

CONSORT = Consolidated Standards of Reporting Trials.

## REFERENCES

- 1 Carter BA, Cohran VC, Cole CR, et al. Outcomes from a 12-week, open-label, multicenter clinical trial of teduglutide in pediatric short bowel syndrome. *J Pediatr* 2017;181:102-11.e5.
- 2 Kocoshis SA, Merritt RJ, Hill S, et al. Safety and efficacy of teduglutide in pediatric patients with intestinal failure due to short bowel syndrome: a 24-week, phase III study. *JPEN J Parenter Enteral Nutr* 2020;44(4):621-31.

**Table, Supplemental Digital Content 2.** Average BSFS score

| Average BSFS score   | Teduglutide                 |                            |                   | SoC<br>(n = 9)   |
|----------------------|-----------------------------|----------------------------|-------------------|------------------|
|                      | 0.025 mg/kg/day<br>(n = 24) | 0.05 mg/kg/day<br>(n = 26) | Total<br>(n = 50) |                  |
| <b>Baseline</b>      |                             |                            |                   |                  |
| n                    | 19                          | 24                         | 43                | 8                |
| Median (min, max)    | 7.0 (5.7, 7.0)              | 7.0 (4.8, 7.0)             | 7.0 (4.8, 7.0)    | 7.0 (6.5, 7.0)   |
| Mean (SE)            | 6.6 (0.1)                   | 6.6 (0.1)                  | 6.6 (0.1)         | 6.9 (0.1)        |
| <b>Week 12</b>       |                             |                            |                   |                  |
| Actual value         |                             |                            |                   |                  |
| n                    | 18                          | 23                         | 41                | 5                |
| Median (min, max)    | 3.5 (2.5, 7.0)              | 6.0 (1.0, 7.0)             | 5.5 (1.0, 7.0)    | 3.5 (3.0, 7.0)   |
| Mean (SE)            | 4.6 (0.4)                   | 4.9 (0.4)                  | 4.8 (0.3)         | 4.8 (0.9)        |
| Change from baseline |                             |                            |                   |                  |
| n                    | 18                          | 23                         | 41                | 5                |
| Median (min, max)    | -2.8 (-4.0, 0.0)            | -1.0 (-6.0, 0.0)           | -1.0 (-6.0, 0.0)  | -3.0 (-4.0, 0.0) |
| Mean (SE)            | -2.0 (0.4)                  | -1.7 (0.4)                 | -1.8 (0.3)        | -2.1 (0.9)       |
| P value              | 0.0001                      | 0.0001                     | < 0.0001          | 0.0736           |
| <b>Week 24</b>       |                             |                            |                   |                  |
| Actual value         |                             |                            |                   |                  |
| n                    | 17                          | 24                         | 41                | 4                |
| Median (min, max)    | 3.5 (2.0, 7.0)              | 3.5 (2.0, 7.0)             | 3.5 (2.0, 7.0)    | 4.8 (3.0, 7.0)   |
| Mean (SE)            | 4.7 (0.5)                   | 4.2 (0.4)                  | 4.4 (0.3)         | 4.9 (1.0)        |
| Change from baseline |                             |                            |                   |                  |

| Average BSFS score  | Teduglutide                 |                            |                   | SoC<br>(n = 9)   |
|---------------------|-----------------------------|----------------------------|-------------------|------------------|
|                     | 0.025 mg/kg/day<br>(n = 24) | 0.05 mg/kg/day<br>(n = 26) | Total<br>(n = 50) |                  |
| n                   | 17                          | 24                         | 41                | 4                |
| Median (min, max)   | -3.0 (-4.0, 0.0)            | -3.0 (-4.5, 0.5)           | -3.0 (-4.5, 0.5)  | -2.0 (-4.0, 0.0) |
| Mean (SE)           | -2.0 (0.4)                  | -2.3 (0.4)                 | -2.2 (0.3)        | -2.0 (0.9)       |
| <i>P</i> value      | 0.0002                      | < 0.0001                   | < 0.0001          | 0.1162           |
| Change from week 12 |                             |                            |                   |                  |
| n                   | 16                          | 23                         | 39                | 4                |
| Median (min, max)   | 0.0 (-3.5, 3.5)             | 0.0 (-3.5, 3.0)            | 0.0 (-3.5, 3.5)   | 0.0 (-4.0, 3.0)  |
| Mean (SE)           | 0.2 (0.5)                   | -0.7 (0.4)                 | -0.3 (0.3)        | -0.3 (1.4)       |
| <i>P</i> value      | 0.6626                      | 0.1273                     | 0.3612            | 0.8729           |

*P* values were generated from a paired difference t-test comparing week 12 and week 24 with baseline values, or between week 12 and week 24 values.

Data were from NCT02682381.

BSFS scores were calculated based on the minimum value of the available scores in a 4-week period. Some patients may have only one available score for a particular 4-week period.

BSFS = Bristol Stool Form Scale; SoC = standard of care; SE = standard error.

**Table, Supplemental Digital Content 3. Change in PN/IV volume**

| PN/IV volume,<br>mL/kg/day | Teduglutide                    |                             |                            |                       | SoC<br>(n = 14)       |
|----------------------------|--------------------------------|-----------------------------|----------------------------|-----------------------|-----------------------|
|                            | 0.0125<br>mg/kg/day<br>(n = 8) | 0.025 mg/kg/day<br>(n = 38) | 0.05 mg/kg/day<br>(n = 41) | Total<br>(n = 87)     |                       |
| Baseline                   |                                |                             |                            |                       |                       |
| n                          | 7                              | 34                          | 39                         | 80                    | 14                    |
| Median<br>(min, max)       | 50.4 (27.1,<br>100.0)          | 61.9 (12.3, 141.7)          | 56.3 (23.6, 132.9)         | 56.9 (12.3,<br>141.7) | 82.5 (32.6,<br>125.9) |
| Mean (SE)                  | 55.3 (9.1)                     | 64.0 (4.8)                  | 62.4 (4.5)                 | 62.4 (3.1)            | 79.6 (6.9)            |
| Week 12                    |                                |                             |                            |                       |                       |
| Actual value               |                                |                             |                            |                       |                       |
| n                          | 7                              | 36                          | 37                         | 80                    | 13                    |
| Median<br>(min, max)       | 48.0 (10.9,<br>90.0)           | 44.5 (0.0, 108.8)           | 39.7 (0.0, 123.5)          | 42.2 (0.0, 123.5)     | 79.5 (27.6,<br>128.0) |
| Mean (SE)                  | 50.2 (9.1)                     | 44.8 (4.5)                  | 45.6 (4.9)                 | 45.6 (3.1)            | 78.5 (7.6)            |

| PN/IV volume,<br>mL/kg/day | Teduglutide                    |                             |                            |                       | SoC<br>(n = 14)       |
|----------------------------|--------------------------------|-----------------------------|----------------------------|-----------------------|-----------------------|
|                            | 0.0125<br>mg/kg/day<br>(n = 8) | 0.025 mg/kg/day<br>(n = 38) | 0.05 mg/kg/day<br>(n = 41) | Total<br>(n = 87)     |                       |
| Change from baseline       |                                |                             |                            |                       |                       |
| n                          | 7                              | 32                          | 36                         | 75                    | 13                    |
| Median<br>(min, max)       | -2.4 (-16.3,<br>1.1)           | -14.8 (-63.8, 4.1)          | -11.8 (-49.9, -1.6)        | -12.3 (-63.8,<br>4.1) | -2.3 (-5.8, 14.7)     |
| Mean (SE)                  | -5.1 (2.3)                     | -19.1 (2.9)                 | -17.3 (2.1)                | -16.9 (1.7)           | 0.1 (1.8)             |
| <i>P</i> value             | 0.0701                         | < 0.0001                    | < 0.0001                   | < 0.0001              | 0.9375                |
| Week 24                    |                                |                             |                            |                       |                       |
| Actual value               |                                |                             |                            |                       |                       |
| n                          | N/A                            | 24                          | 26                         | 50                    | 9                     |
| Median<br>(min, max)       | N/A                            | 43.0 (0.0, 121.4)           | 32.5 (0.0, 109.8)          | 38.4 (0.0, 121.4)     | 76.6 (18.0,<br>125.0) |
| Mean (SE)                  | N/A                            | 45.8 (6.2)                  | 36.5 (5.2)                 | 40.9 (4.1)            | 73.6 (11.0)           |
| Change from baseline       |                                |                             |                            |                       |                       |
| n                          | N/A                            | 20                          | 25                         | 45                    | 9                     |
| Median<br>(min, max)       | N/A                            | -17.7 (-33.7, 2.8)          | -18.8 (-61.4, 1.9)         | -18.4 (-61.4,<br>2.8) | -5.9 (-14.6, 0.4)     |
| Mean (SE)                  | N/A                            | -16.2 (2.4)                 | -23.3 (3.5)                | -20.1 (2.3)           | -6.0 (1.5)            |
| <i>P</i> value             | N/A                            | < 0.0001                    | < 0.0001                   | < 0.0001              | 0.0041                |

*P* values were generated from a paired difference t-test comparing mean week 12 and week 24 values with mean baseline values.

Data were pooled from NCT01952080 and NCT02682381.

N/A = not applicable; PN/IV = parenteral nutrition and/or intravenous fluids; SE = standard error; SoC = standard of care.

**Table, Supplemental Digital Content 4.** Change in enteral nutrition volume

| Enteral nutrition<br>volume,<br>mL/kg/day | Teduglutide                    |                             |                            |                   | SoC<br>(n = 14) |
|-------------------------------------------|--------------------------------|-----------------------------|----------------------------|-------------------|-----------------|
|                                           | 0.0125<br>mg/kg/day<br>(n = 8) | 0.025 mg/kg/day<br>(n = 38) | 0.05 mg/kg/day<br>(n = 41) | Total<br>(n = 87) |                 |
| Baseline                                  |                                |                             |                            |                   |                 |
| n                                         | 8                              | 32                          | 39                         | 79                | 14              |

| Enteral nutrition volume, mL/kg/day | Teduglutide              |                          |                         |                   | SoC (n = 14)      |
|-------------------------------------|--------------------------|--------------------------|-------------------------|-------------------|-------------------|
|                                     | 0.0125 mg/kg/day (n = 8) | 0.025 mg/kg/day (n = 38) | 0.05 mg/kg/day (n = 41) | Total (n = 87)    |                   |
| Median (min, max)                   | 20.5 (0.0, 109.6)        | 26.3 (0.0, 91.9)         | 17.9 (0.0, 111.9)       | 23.1 (0.0, 111.9) | 12.8 (0.0, 86.8)  |
| Mean (SE)                           | 34.3 (14.6)              | 29.1 (4.9)               | 26.1 (4.3)              | 28.1 (3.2)        | 25.5 (8.3)        |
| Week 12                             |                          |                          |                         |                   |                   |
| Actual value                        |                          |                          |                         |                   |                   |
| n                                   | 7                        | 35                       | 38                      | 80                | 13                |
| Median (min, max)                   | 51.8 (0.0, 105.1)        | 37.6 (0.0, 127.2)        | 25.1 (0.0, 155.0)       | 33.6 (0.0, 155.0) | 17.5 (0.0, 90.5)  |
| Mean (SE)                           | 51.9 (14.6)              | 40.1 (5.9)               | 35.3 (5.8)              | 38.9 (4.0)        | 29.7 (9.7)        |
| Change from baseline                |                          |                          |                         |                   |                   |
| n                                   | 7                        | 30                       | 37                      | 74                | 13                |
| Median (min, max)                   | 10.8 (-4.5, 35.3)        | 1.2 (-6.4, 70.8)         | 4.6 (-6.6, 43.1)        | 3.4 (-6.6, 70.8)  | 0.0 (-2.2, 15.6)  |
| Mean (SE)                           | 12.7 (5.8)               | 10.0 (3.3)               | 7.9 (1.7)               | 9.2 (1.7)         | 2.8 (1.3)         |
| P value                             | 0.0709                   | 0.0052                   | 0.0001                  | < 0.0001          | 0.0617            |
| Week 24                             |                          |                          |                         |                   |                   |
| Actual value                        |                          |                          |                         |                   |                   |
| n                                   | N/A                      | 23                       | 26                      | 49                | 9                 |
| Median (min, max)                   | N/A                      | 17.3 (0.0, 94.1)         | 27.0 (0.0, 163.8)       | 23.8 (0.0, 163.8) | 2.9 (0.0, 61.9)   |
| Mean (SE)                           | N/A                      | 29.1 (6.2)               | 40.2 (7.9)              | 35.0 (5.1)        | 14.8 (7.2)        |
| Change from baseline                |                          |                          |                         |                   |                   |
| n                                   | N/A                      | 18                       | 25                      | 43                | 9                 |
| Median (min, max)                   | N/A                      | 3.3 (-14.8, 47.3)        | 5.8 (-7.1, 61.7)        | 5.1 (-14.8, 61.7) | 0.0 (-11.8, 10.1) |
| Mean (SE)                           | N/A                      | 7.7 (3.2)                | 11.0 (3.3)              | 9.6 (2.3)         | 0.7 (2.0)         |
| P value                             | N/A                      | 0.0269                   | 0.0030                  | 0.0002            | 0.7176            |
| Change from week 12                 |                          |                          |                         |                   |                   |
| n                                   | N/A                      | 23                       | 26                      | 49                | 9                 |

| Enteral nutrition volume, mL/kg/day | Teduglutide              |                          |                         | Total (n = 87)    | SoC (n = 14)    |
|-------------------------------------|--------------------------|--------------------------|-------------------------|-------------------|-----------------|
|                                     | 0.0125 mg/kg/day (n = 8) | 0.025 mg/kg/day (n = 38) | 0.05 mg/kg/day (n = 41) |                   |                 |
| Median (min, max)                   | N/A                      | 1.9 (-16.3, 30.9)        | 0.5 (-8.1, 38.1)        | 1.3 (-16.3, 38.1) | 0.0 (-9.6, 2.7) |
| Mean (SE)                           | N/A                      | 3.4 (2.1)                | 3.3 (1.6)               | 3.3 (1.3)         | -0.7 (1.2)      |
| <i>P</i> value                      | N/A                      | 0.1221                   | 0.0543                  | 0.0133            | 0.5379          |

*P* values were generated from a paired difference t-test comparing mean week 12 and week 24 values with mean baseline values, or between mean week 12 and week 24 values.

Data were pooled from NCT01952080 and NCT02682381.

N/A = not applicable; SE = standard error; SoC = standard of care.

**Table, Supplemental Digital Content 5.** Change in stool frequency per day

| Stool frequency per day                | Teduglutide              |                         |                  | SoC (n = 9)      |
|----------------------------------------|--------------------------|-------------------------|------------------|------------------|
|                                        | 0.025 mg/kg/day (n = 24) | 0.05 mg/kg/day (n = 26) | Total (n = 50)   |                  |
| <b>Baseline</b>                        |                          |                         |                  |                  |
| n                                      | 18                       | 22                      | 40               | 6                |
| Median (min, max)                      | 3.0 (0.5, 11.0)          | 3.0 (1.0, 8.5)          | 3.0 (0.5, 11.0)  | 4.8 (2.5, 7.5)   |
| Mean (SE)                              | 3.4 (0.5)                | 3.5 (0.4)               | 3.5 (0.3)        | 5.1 (0.8)        |
| <b>Week 12</b>                         |                          |                         |                  |                  |
| <b>Actual value</b>                    |                          |                         |                  |                  |
| n                                      | 15                       | 16                      | 31               | 2                |
| Median (min, max)                      | 2.0 (1.0, 6.5)           | 2.8 (1.0, 5.5)          | 2.5 (1.0, 6.5)   | 5.8 (2.0, 9.5)   |
| Mean (SE)                              | 2.9 (0.4)                | 2.8 (0.4)               | 2.8 (0.3)        | 5.8 (3.8)        |
| <b>Change from baseline to week 12</b> |                          |                         |                  |                  |
| n                                      | 13                       | 16                      | 29               | 2                |
| Median (min, max)                      | -0.5 (-4.5, 2.0)         | -0.6 (-3.0, 1.5)        | -0.5 (-4.5, 2.0) | -0.3 (-2.5, 2.0) |
| Mean (SE)                              | -0.7 (0.5)               | -0.8 (0.4)              | -0.8 (0.3)       | -0.3 (2.3)       |

| Stool frequency per day | Teduglutide                 |                            |                   | SoC<br>(n = 9)    |
|-------------------------|-----------------------------|----------------------------|-------------------|-------------------|
|                         | 0.025 mg/kg/day<br>(n = 24) | 0.05 mg/kg/day<br>(n = 26) | Total<br>(n = 50) |                   |
| <i>P</i> value          | 0.1456                      | 0.0522                     | 0.0133            | 0.9296            |
| Week 24                 |                             |                            |                   |                   |
| Actual value            |                             |                            |                   |                   |
| n                       | 16                          | 16                         | 32                | 2                 |
| Median (min, max)       | 2.5 (0.5, 11.0)             | 3.0 (1.0, 10.5)            | 3.0 (0.5, 11.0)   | 1.3 (0.0, 2.5)    |
| Mean (SE)               | 3.3 (0.6)                   | 3.5 (0.6)                  | 3.4 (0.4)         | 1.3 (1.3)         |
| Change from baseline    |                             |                            |                   |                   |
| n                       | 13                          | 16                         | 29                | 2                 |
| Median (min, max)       | -0.5 (-5.5, 7.0)            | 0.0 (-3.5, 9.5)            | -0.5 (-5.5, 9.5)  | -2.0 (-2.5, -1.5) |
| Mean (SE)               | -0.1 (0.8)                  | 0.2 (0.7)                  | 0.1 (0.5)         | -2.0 (0.5)        |
| <i>P</i> value          | 0.8986                      | 0.7565                     | 0.8846            | 0.1560            |

*P* values were generated from a paired difference t-test comparing mean week 12 and week 24 values with mean baseline values.

Data from NCT02682381.

SE = standard error; SoC = standard of care.

**Table, Supplemental Digital Content 6.** Effects of disease and patient characteristics on stool consistency (BSFS)

| Parameter                                                   | F-value | <i>P</i> value |
|-------------------------------------------------------------|---------|----------------|
| Week 12                                                     |         |                |
| Current age, year                                           | 1.99    | 0.1661         |
| Age at diagnosis, year                                      | 2.26    | 0.1403         |
| Baseline BMI, kg/m <sup>2</sup>                             | 0.17    | 0.6807         |
| Reason for SBS                                              | 2.54    | 0.0552         |
| Remaining small intestine length, cm                        | 0.16    | 0.6944         |
| Anti-diarrheal use between baseline and week 12             | 2.20    | 0.1455         |
| Antibiotic use between baseline and week 12                 | 3.86    | 0.0563         |
| Change in enteral nutrition volume <sup>†</sup> , mL/kg/day | 0.91    | 0.3471         |
| Change in PN/IV volume <sup>†</sup> , mL/kg/day             | 0.98    | 0.3299         |
| Change in urine output, mL/kg/day                           | 0.09    | 0.7707         |

| Week 24                                                     |      |        |
|-------------------------------------------------------------|------|--------|
| Current age, year                                           | 1.78 | 0.1894 |
| Age at diagnosis, year                                      | 2.17 | 0.1485 |
| Baseline BMI, kg/m <sup>2</sup>                             | 0.18 | 0.6739 |
| Reason for SBS                                              | 1.98 | 0.1182 |
| Remaining small intestine length, cm                        | 0.57 | 0.4542 |
| Anti-diarrheal use between week 12 and week 24              | 0.65 | 0.4244 |
| Antibiotic use between week 12 and week 24                  | 0.32 | 0.5739 |
| Change in enteral nutrition volume <sup>†</sup> , mL/kg/day | 0.12 | 0.7281 |
| Change in PN/IV volume <sup>†</sup> , mL/kg/day             | 2.08 | 0.1573 |
| Change in urine output, mL/kg/day                           | 1.30 | 0.2657 |

<sup>†</sup>Based on diary data.

*P* values are from ANCOVA analysis modeling BSFS score change from baseline as the dependent variable and baseline BSFS score, treatment, and a third factor as independent variables.

Data from NCT02682381.

ANCOVA, analysis of covariance; BMI = body mass index; BSFS = Bristol Stool Form Scale; PN/IV = parenteral nutrition and/or intravenous fluids; SBS = short bowel syndrome.

**Table, Supplemental Digital Content 7.** Change in anti-diarrheal doses per day

| Anti-diarrheal doses per day | Teduglutide                 |                             |                            | Total<br>(n = 87) | SoC<br>(n = 14) |
|------------------------------|-----------------------------|-----------------------------|----------------------------|-------------------|-----------------|
|                              | 0.0125 mg/kg/day<br>(n = 8) | 0.025 mg/kg/day<br>(n = 38) | 0.05 mg/kg/day<br>(n = 41) |                   |                 |
| Baseline                     |                             |                             |                            |                   |                 |
| n                            | 3                           | 12                          | 18                         | 33                | 3               |
| Median<br>(min, max)         | 2.0 (2.0, 6.0)              | 3.0 (2.0, 6.0)              | 3.0 (1.0, 10.0)            | 3.0 (1.0, 10.0)   | 3.0 (2.0, 3.0)  |
| Mean (SD)                    | 3.3 (2.3)                   | 3.3 (1.1)                   | 3.1 (2.0)                  | 3.2 (1.7)         | 2.7 (0.6)       |
| Week 12                      |                             |                             |                            |                   |                 |
| n                            | 2                           | 12                          | 17                         | 31                | 3               |
| Median<br>(min, max)         | 4.0 (2.0, 6.0)              | 3.0 (2.0, 6.0)              | 3.0 (1.0, 10.0)            | 3.0 (1.0, 10.0)   | 3.0 (2.0, 3.0)  |
| Mean (SD)                    | 4.0 (2.8)                   | 3.3 (1.1)                   | 2.9 (2.1)                  | 3.1 (1.8)         | 2.7 (0.6)       |
| Week 24                      |                             |                             |                            |                   |                 |



| Anti-diarrheal doses per day | Teduglutide                 |                             |                            |                   | SoC<br>(n = 14) |
|------------------------------|-----------------------------|-----------------------------|----------------------------|-------------------|-----------------|
|                              | 0.0125 mg/kg/day<br>(n = 8) | 0.025 mg/kg/day<br>(n = 38) | 0.05 mg/kg/day<br>(n = 41) | Total<br>(n = 87) |                 |
| n                            | N/A                         | 10                          | 11                         | 21                | 2               |
| Median<br>(min, max)         | N/A                         | 3.0 (1.0, 4.0)              | 3.0 (1.0, 5.0)             | 3.0 (1.0, 5.0)    | 3.0 (3.0, 3.0)  |
| Mean (SD)                    | N/A                         | 2.6 (1.1)                   | 2.8 (1.2)                  | 2.7 (1.1)         | 3.0 (0.0)       |

Anti-diarrheal medications include loperamide, loperamide hydrochloride, lomotil, and hyoscyamine sulfate. Doses were counted as number of doses per day (e.g., twice daily, three times daily, four times daily) regardless of amount received. Doses received for multiple medications were added to obtain the total number of doses received per day.

Data were pooled from NCT01952080 and NCT02682381.

N/A = not applicable; SD = standard deviation; SoC = standard of care
